# Supplementary material for: Bacteria-mediated regulation of Aphidius gifuensis parasitism efficacy in Myzus persicae: Implications for biological control strategies
Source: Research Square preprint supplement (doi:10.21203/rs.3.rs-7234244/v1), 2025-09-04
Supplement: Supplementary file 1 [file a974462846b97e3a7b5370f5.xlsx]

## Sheet: Figure1
											Fig.1 Colony morphology of endophytic bacteria in M. persicae and A. gifuensis
											A: Lysinibacillus fusiformis; B: Bacillus cereus; C: Stenotrophomonas maltophilia; D: Bacillus pumilus; E: Bacillus subtilis; F: Acinetobacter radioresistens; G: Exiguobacterium sibiricum

## Sheet: Figure2
Fecundity rate	Bacillus subtilis	Lysinibacillus fusiformis	Bacillus pumilus	Acinetobacter radioresistens	Exiguobacterium sibiricum	Bacillus cereus	Stenotrophomonas maltophilia
Ck	46	46	46.31	42	45	46	46
Ck	48	43	45	43	44	47	42
Ck	42	44	47	43	45	44	47
0.97×1010	29	32.3333	29	31.6667	38.3333	24.6667	50
0.97×1010	25.667	46.333	27	32	40	27	51
0.97×1010	27.667	35.333	36	33	37	25	45
0.97×109	55	50	61	24.3333	35.6667	55	85
0.97×109	51	52	67	24	37	54.3333	87
0.97×109	53.333	54	62.333	21	33	56	82.333
0.97×108	40	45	35	26.667	30	40	65
0.97×108	41	48	32	26	31.333	40	62
0.97×108	44	51	36	25.333	32	37	55
0.97×107	42	42	29	21.667	30	33.333	57
0.97×107	41	42.333	27.667	22	31	35	57
0.97×107	40	46	21	24	31.333	40	60
0.97×106	37	35	28	22.333	37	39.333	60
0.97×106	37	32.333	28	25	37.667	36	51
0.97×106	35	36	27	24	34	34	61
		Fig. 2 Effect of different endophytic bacteria on the offspring number of M. persicae.

## Sheet: Figure3、Table1、Table2
	Standard Curve：y = 7.3614x + 0.0328
		Protein content（μg）	0	0.02	0.04	0.06	0.08	0.1
		OD value	0	0.226	0.323	0.471	0.621	0.764
				Fig. 3 standard curve of bovine serum albumin
	Acinetobacter radioresistens										An aphid weighs 3.6 mg
	Carboxylesterase						Phenoloxidase								Superoxide dismutase
		Content absorbance	Content	Activity absorbance	Activity			Content absorbance	Content	Activity absorbance1	Activity absorbance2	Activity Δabsorbance	Activity			Content absorbance	Content	Control Absorbance	Test sample absorbance	Activity
	ck	0.671	0.0866955	0.051	2.50994		ck	0.701	0.0907708	0.511	0.513	0.002	1.0582		ck	0.62	0.0797674	0.88	0.223	12.4432
	ck	0.673	0.0869672	0.053	2.60022		ck	0.71	0.0919934	0.514	0.517	0.003	1.5873		ck	0.622	0.0800391	0.882	0.238	12.1693
	ck	0.671	0.0866955	0.05	2.46072		ck	0.706	0.09145	0.512	0.514	0.002	1.0582		ck	0.632	0.0813976	0.887	0.232	12.3074
	0.97×1010	0.677	0.0875105	0.054	2.63283		0.97×1010	0.711	0.0921292	0.516	0.517	0.001	0.529101		0.97×1010	0.653	0.0842503	0.886	0.234	12.2649
	0.97×1010	0.677	0.0875105	0.053	2.58407		0.97×1010	0.712	0.0922651	0.515	0.517	0.002	1.0582		0.97×1010	0.651	0.0839786	0.883	0.228	12.3632
	0.97×1010	0.678	0.0876464	0.054	2.62875		0.97×1010	0.709	0.0918575	0.51	0.513	0.003	1.5873		0.97×1010	0.653	0.0842503	0.877	0.219	12.5048
	0.97×109	0.667	0.0861521	0.052	2.57529		0.97×109	0.706	0.09145	0.521	0.523	0.002	1.0582		0.97×109	0.655	0.084522	0.889	0.22	12.5422
	0.97×109	0.668	0.0862879	0.053	2.62068		0.97×109	0.707	0.0915858	0.524	0.525	0.001	0.529101		0.97×109	0.656	0.0846578	0.884	0.224	12.4434
	0.97×109	0.667	0.0861521	0.055	2.72387		0.97×109	0.703	0.0910425	0.525	0.526	0.001	0.529101		0.97×109	0.652	0.0841144	0.888	0.216	12.6126
	0.97×108	0.671	0.0866955	0.056	2.75601		0.97×108	0.706	0.09145	0.517	0.518	0.001	0.529101		0.97×108	0.651	0.0839786	0.885	0.229	12.354
	0.97×108	0.671	0.0866955	0.057	2.80522		0.97×108	0.711	0.0921292	0.516	0.518	0.002	1.0582		0.97×108	0.65	0.0838427	0.878	0.23	12.3007
	0.97×108	0.67	0.0865596	0.055	2.71104		0.97×108	0.712	0.0922651	0.513	0.517	0.004	2.1164		0.97×108	0.653	0.0842503	0.881	0.236	12.202
	0.97×107	0.677	0.0875105	0.051	2.48656		0.97×107	0.712	0.0922651	0.516	0.517	0.001	0.529101		0.97×107	0.649	0.0837069	0.89	0.218	12.5843
	0.97×107	0.676	0.0873747	0.052	2.53926		0.97×107	0.713	0.0924009	0.518	0.519	0.001	0.529101		0.97×107	0.651	0.0839786	0.876	0.231	12.2717
	0.97×107	0.679	0.0877822	0.051	2.47886		0.97×107	0.711	0.0921292	0.515	0.517	0.002	1.0582		0.97×107	0.652	0.0841144	0.875	0.221	12.4571
	0.97×106	0.673	0.0869672	0.053	2.60022		0.97×106	0.711	0.0921292	0.514	0.516	0.002	1.0582		0.97×106	0.651	0.0839786	0.879	0.237	12.1729
	0.97×106	0.674	0.087103	0.051	2.49819		0.97×106	0.714	0.0925367	0.515	0.517	0.002	1.0582		0.97×106	0.654	0.0843861	0.877	0.225	12.3907
	0.97×106	0.671	0.0866955	0.052	2.55915		0.97×106	0.713	0.0924009	0.517	0.52	0.003	1.5873		0.97×106	0.652	0.0841144	0.88	0.226	12.3864
					Table 1 Effect of A. radioresistens on the content and activity of enzymes related to growth and development of the offspring of M. persicae
					Note: The data in the table are mean ± standard error; different lowercase letters after the data in the same column indicate significant differences (one-way ANOVA, Duncan's new multiple range method for variance analysis, P<0.05), the same applies below
					（cfu/ml）	（mg/mL）	(μmol/(min·mg))	（mg/mL）	(U/(mg·min))	(mg/mL)	(U/(mg·min))
					Concentrantion	Carboxylesterase	Carboxylesterase activity	Phenoloxidase content	Phenoloxidase activity	SOD activity	SOD activity
						content
					Ck	0.0868 ±0.0002b	2.5236 ±0.0707a	0.0914±0.0004a	1.2346±0.1764a	0.0804±0.0005a	12.3066±0.0791ab
					0.97×1010	0.0876±0.0001c	2.6152±0.0270a	0.0921±0.0001b	1.0582±0.3055a	0.0842±0.0001b	12.3776±0.0696ab
					0.97×109	0.0862±0.0001a	2.6399±0.0761ab	0.0914±0.0002a	0.7055±0.1764a	0.0844±0.0002b	12.5327±0.0491b
					0.97×108	0.0867±0.0001b	2.7574±0.0471b	0.0919±0.0003ab	1.2346±0.4666a	0.0840±0.0001b	12.2856±0.0445a
					0.97×107	0.0876 ±0.0002c	2.5016±0.0329a	0.0923±0.0001b	0.7055±0.1764a	0.0839±0.0001b	12.4377±0.0908ab
					0.97×106	0.0869±0.0002b	2.5525±0.0513a	0.0924±0.0001b	1.2346±0.1764a	0.0842±0.0001b	12.3167±0.0719ab
	Stenotrophomonas maltophilia										An aphid weighs 3.6 mg
	Carboxylesterase						Phenoloxidase								Superoxide dismutase
		Content absorbance	Content	Activity absorbance	Activity			Content absorbance	Content	Activity absorbance1	Activity absorbance2	Activity Δabsorbance	Activity			Content absorbance	Content	Control Absorbance	Test sample absorbance	Activity
	ck	0.677	0.0875105	0.051	2.48656		ck	0.701	0.0907708	0.51	0.514	0.004	2.1164		ck	0.622	0.0800391	0.882	0.233	12.2638
	ck	0.674	0.087103	0.053	2.59616		ck	0.711	0.0921292	0.513	0.517	0.004	2.1164		ck	0.623	0.080175	0.883	0.234	12.2499
	ck	0.675	0.0872388	0.054	2.64103		ck	0.708	0.0917217	0.511	0.516	0.005	2.6455		ck	0.629	0.08099	0.885	0.236	12.2222
	0.97×1010	0.679	0.0877822	0.053	2.57607		0.97×1010	0.719	0.093216	0.52	0.524	0.004	2.1164		0.97×1010	0.642	0.082756	0.886	0.234	12.2649
	0.97×1010	0.68	0.0879181	0.053	2.57209		0.97×1010	0.719	0.093216	0.519	0.527	0.008	4.2328		0.97×1010	0.639	0.0823485	0.881	0.231	12.2966
	0.97×1010	0.684	0.0884614	0.055	2.65276		0.97×1010	0.715	0.0926726	0.515	0.522	0.007	3.7037		0.97×1010	0.644	0.0830277	0.885	0.23	12.3352
	0.97×109	0.676	0.0873747	0.06	2.92991		0.97×109	0.714	0.0925367	0.517	0.523	0.006	3.1746		0.97×109	0.633	0.0815334	0.882	0.233	12.2638
	0.97×109	0.68	0.0879181	0.058	2.81474		0.97×109	0.719	0.093216	0.518	0.527	0.009	4.7619		0.97×109	0.636	0.0819409	0.885	0.233	12.2787
	0.97×109	0.675	0.0872388	0.055	2.68993		0.97×109	0.713	0.0924009	0.515	0.521	0.006	3.1746		0.97×109	0.636	0.0819409	0.879	0.227	12.3625
	0.97×108	0.684	0.0884614	0.054	2.60452		0.97×108	0.71	0.0919934	0.522	0.529	0.007	3.7037		0.97×108	0.631	0.0812617	0.877	0.23	12.2957
	0.97×108	0.677	0.0875105	0.058	2.82785		0.97×108	0.719	0.093216	0.515	0.52	0.005	2.6455		0.97×108	0.64	0.0824843	0.875	0.225	12.381
	0.97×108	0.679	0.0877822	0.057	2.77049		0.97×108	0.713	0.0924009	0.523	0.527	0.004	2.1164		0.97×108	0.637	0.0820768	0.885	0.23	12.3352
	0.97×107	0.682	0.0881897	0.056	2.70931		0.97×107	0.719	0.093216	0.519	0.527	0.008	4.2328		0.97×107	0.64	0.0824843	0.876	0.234	12.2146
	0.97×107	0.677	0.0875105	0.062	3.02287		0.97×107	0.712	0.0922651	0.516	0.52	0.004	2.1164		0.97×107	0.643	0.0828918	0.879	0.233	12.2488
	0.97×107	0.684	0.0884614	0.055	2.65276		0.97×107	0.714	0.0925367	0.519	0.526	0.007	3.7037		0.97×107	0.645	0.0831635	0.877	0.235	12.2007
	0.97×106	0.684	0.0884614	0.056	2.70099		0.97×106	0.715	0.0926726	0.517	0.522	0.005	2.6455		0.97×106	0.636	0.0819409	0.885	0.226	12.4105
	0.97×106	0.682	0.0881897	0.057	2.75769		0.97×106	0.718	0.0930801	0.522	0.53	0.008	4.2328		0.97×106	0.643	0.0828918	0.881	0.227	12.3723
	0.97×106	0.676	0.0873747	0.057	2.78341		0.97×106	0.72	0.0933518	0.518	0.525	0.007	3.7037		0.97×106	0.643	0.0828918	0.877	0.229	12.3147
				Table 2 Effect of S. maltophilia on the content and activity of enzymes related to growth and development of the offspring of M. persicae
				（cfu/ml）	（mg/mL）	(μmol/(min·mg))	（mg/mL）	（U/(mg·min))	(mg/mL)	(U/(mg·min))
				Concentrantion	Carboxylesterase	Carboxylesterase activity	Phenoloxidase content	Phenoloxidase activity	SOD activity	SOD activity
					content
				Ck	0.0873±0.0001a	2.5746±0.0459a	0.0915±0.0004a	2.2928±0.1764a	0.0804±0.0003a	12.2453±0.0122ab
				0.97×1010	0.0881±0.0002a	2.6003±0.0263ab	0.0930±0.0002b	3.3510±0.6359a	0.0827±0.0002cd	12.2989±0.0203bc
				0.97×109	0.0875±0.0002a	2.8115±0.0693b	0.0927±0.0003ab	3.7037±0.5291a	0.0818±0.0001b	12.3017±0.0307bc
				0.97×108	0.0879±0.0003a	2.7343±0.0670ab	0.0925±0.0004ab	2.8219±0.4666a	0.0819±0.0004bc	12.3373±0.0246c
				0.97×107	0.0881±0.0003a	2.7950±0.1151ab	0.0927±0.0003ab	3.3510±0.6359a	0.0828±0.0002d	12.2214±0.0143a
				0.97×106	0.0880±0.0003a	2.7474±0.0243ab	0.0930±0.0002b	3.5273±0.4666a	0.0826±0.0003bcd	12.3659±0.0279c

## Sheet: Table3~Table9
	Bacillus subtilis
		Parasitism rate	Number ecolosed	Ecolosion rate	Number of female wasps	Proportion of female wasps
	ck	0.42	0.36	0.857143	0.21	0.583333
	ck	0.43	0.36	0.837209	0.22	0.611111
	ck	0.4	0.33	0.825	0.2	0.606061
	0.97×1010	0.48	0.38	0.791667	0.24	0.631579
	0.97×1010	0.46	0.39	0.847826	0.27	0.692308
	0.97×1010	0.49	0.4	0.816327	0.22	0.55
	0.97×109	0.45	0.36	0.8	0.19	0.527778
	0.97×109	0.46	0.37	0.804348	0.24	0.648649
	0.97×109	0.42	0.36	0.857143	0.22	0.611111
	0.97×108	0.44	0.38	0.863636	0.26	0.684211
	0.97×108	0.46	0.39	0.847826	0.29	0.74359
	0.97×108	0.45	0.39	0.866667	0.24	0.615385
	0.97×107	0.47	0.37	0.787234	0.21	0.567568
	0.97×107	0.44	0.4	0.909091	0.26	0.65
	0.97×107	0.42	0.36	0.857143	0.18	0.5
	0.97×106	0.46	0.38	0.826087	0.27	0.710526
	0.97×106	0.48	0.4	0.833333	0.21	0.525
	0.97×106	0.48	0.39	0.8125	0.21	0.538462
			Table 3 Effect of B. subtilis on the parasitism of A. gifuensis on M. persicae
			Concentrantion (cuf/ml)	Parasitism rate (%)	Emergence rate (%)	Proportion of females (%)
			Ck	41.67±0.88a	83.98±1.62a	60.02±0.85a
			0.97×1010	47.67±0.88b	81.86±2.81a	62.46±4.12a
			0.97×109	44.33±1.20ab	82.05±3.18a	59.58±3.57a
			0.97×108	45.00±0.58b	85.91±1.01a	68.11±3.70a
			0.97×107	44.33±1.45ab	85.12±6.11a	57.25±4.34a
			0.97×106	47.33±0.67b	82.40±1.06a	59.13±5.97a
	Lysinibacillus fusiformis
		Parasitism rate	Number ecolosed	Ecolosion rate	Number of female wasps	Proportion of female wasps
	ck	0.42	0.35	0.833333	0.22	0.628571
	ck	0.41	0.32	0.780488	0.21	0.65625
	ck	0.42	0.34	0.809524	0.21	0.617647
	0.97×1010	0.46	0.34	0.73913	0.25	0.735294
	0.97×1010	0.46	0.33	0.717391	0.26	0.787879
	0.97×1010	0.45	0.36	0.8	0.22	0.611111
	0.97×109	0.44	0.34	0.772727	0.2	0.588235
	0.97×109	0.42	0.32	0.761905	0.22	0.6875
	0.97×109	0.42	0.29	0.690476	0.22	0.758621
	0.97×108	0.45	0.31	0.688889	0.24	0.774194
	0.97×108	0.43	0.36	0.837209	0.26	0.722222
	0.97×108	0.44	0.35	0.795455	0.24	0.685714
	0.97×107	0.46	0.31	0.673913	0.21	0.677419
	0.97×107	0.42	0.3	0.714286	0.23	0.766667
	0.97×107	0.42	0.32	0.761905	0.21	0.65625
	0.97×106	0.47	0.37	0.787234	0.26	0.702703
	0.97×106	0.44	0.39	0.886364	0.23	0.589744
	0.97×106	0.46	0.36	0.782609	0.24	0.666667
				Table 4 Effect of Lysinibacillus fusiformi on the parasitism of A. gifuensis on M. persicae
				Concentrantion(cuf/ml)	Parasitism rate (%)	Emergence rate (%)	Proportion of females (%)
				Ck	41.67±0.33a	80.67±1.45ab	63.67±1.20a
				0.97×1010	45.67±0.33b	75.33±2.40ab	71.33±5.36a
				0.97×109	42.67±0.67a	74.00±2.52ab	68.00±4.93a
				0.97×108	44.00±0.58ab	77.67±4.49ab	72.67±4.04a
				0.97×107	44.33±1.33ab	71.33±2.60a	70.33±5.86a
				0.97×106	45.67±0.88b	82.00±3.51b	65.33±5.69a
	Bacillus pumilus
		Parasitism rate	Number ecolosed	Ecolosion rate	Number of female wasps	Proportion of female wasps
	ck	0.4	0.36	0.9	0.24	0.666667
	ck	0.43	0.35	0.813953	0.23	0.657143
	ck	0.42	0.33	0.785714	0.21	0.636364
	0.97×1010	0.46	0.37	0.804348	0.24	0.648649
	0.97×1010	0.45	0.39	0.866667	0.26	0.666667
	0.97×1010	0.44	0.38	0.863636	0.27	0.710526
	0.97×109	0.43	0.35	0.813953	0.25	0.714286
	0.97×109	0.43	0.33	0.767442	0.22	0.666667
	0.97×109	0.48	0.32	0.666667	0.23	0.71875
	0.97×108	0.44	0.34	0.772727	0.26	0.764706
	0.97×108	0.45	0.35	0.777778	0.24	0.685714
	0.97×108	0.41	0.36	0.878049	0.26	0.722222
	0.97×107	0.43	0.33	0.767442	0.24	0.727273
	0.97×107	0.41	0.31	0.756098	0.26	0.83871
	0.97×107	0.42	0.32	0.761905	0.23	0.71875
	0.97×106	0.46	0.38	0.826087	0.23	0.605263
	0.97×106	0.44	0.39	0.886364	0.22	0.564103
	0.97×106	0.45	0.37	0.822222	0.27	0.72973
			Table 5 Effect of Bacillus pumilu on the parasitism of A. gifuensis on M. persicae
			Concentrantion (cuf/ml)	Parasitism rate (%)	Emergence rate (%)	Proportion of females (%)
			Ck	41.67±0.88a	83.33±3.38a	65.67±0.88a
			0.97×1010	45.00±0.58a	84.33±2.18a	67.67±1.76ab
			0.97×109	44.67±1.67a	75.00±4.16a	70.00±1.52ab
			0.97×108	43.33±1.20a	81.00±3.51a	72.33±2.02ab
			0.97×107	42.00±0.58a	76.33±0.33a	76.33±3.84b
			0.97×106	45.00±0.58a	84.67±2.18a	63.33±5.04a
	Acinetobacter radioresistens
		Parasitism rate	Number ecolosed	Ecolosion rate	Number of female wasps	Proportion of female wasps
	ck	0.42	0.33	0.785714	0.24	0.727273
	ck	0.44	0.37	0.840909	0.25	0.675676
	ck	0.45	0.34	0.755556	0.21	0.617647
	0.97×1010	0.41	0.35	0.853659	0.26	0.742857
	0.97×1010	0.47	0.33	0.702128	0.27	0.818182
	0.97×1010	0.45	0.39	0.866667	0.22	0.564103
	0.97×109	0.44	0.36	0.818182	0.28	0.777778
	0.97×109	0.49	0.33	0.673469	0.24	0.727273
	0.97×109	0.44	0.35	0.795455	0.27	0.771429
	0.97×108	0.45	0.33	0.733333	0.23	0.69697
	0.97×108	0.41	0.31	0.756098	0.22	0.709677
	0.97×108	0.42	0.35	0.833333	0.27	0.771429
	0.97×107	0.4	0.35	0.875	0.23	0.657143
	0.97×107	0.44	0.36	0.818182	0.23	0.638889
	0.97×107	0.44	0.33	0.75	0.22	0.666667
	0.97×106	0.48	0.37	0.770833	0.23	0.621622
	0.97×106	0.47	0.34	0.723404	0.24	0.705882
	0.97×106	0.48	0.39	0.8125	0.22	0.564103
			Table 6 Effect of A. radioresistens on the parasitism of A. gifuensis on M. persicae
			Concentrantion (cuf/ml)	Parasitism rate (%)	Emergence rate (%)	Proportion of females (%)
			Ck	43.67±0.88ab	79.67±.2.33a	67.67±3.18a
			0.97×1010	44.33±1.76ab	80.67±5.36a	70.67±7.68a
			0.97×109	45.67±1.66ab	76.33±4.70a	76.00±1.52a
			0.97×108	42.67±1.20a	77.33±2.96a	72.67±2.18a
			0.97×107	42.67±1.33a	81.67±3.75a	65.67±0.88a
			0.97×106	47.67±0.33b	76.67±2.60a	63.00±4.35a
	Exiguobacterium sibiricum
		Parasitism rate	Number ecolosed	Ecolosion rate	Number of female wasps	Proportion of female wasps
	ck	0.41	0.35	0.853659	0.23	0.657143
	ck	0.44	0.36	0.818182	0.22	0.611111
	ck	0.43	0.33	0.767442	0.26	0.787879
	0.97×1010	0.43	0.34	0.790698	0.23	0.676471
	0.97×1010	0.44	0.36	0.818182	0.2	0.555556
	0.97×1010	0.41	0.36	0.878049	0.26	0.722222
	0.97×109	0.47	0.35	0.744681	0.26	0.742857
	0.97×109	0.5	0.3	0.6	0.23	0.766667
	0.97×109	0.44	0.38	0.863636	0.25	0.657895
	0.97×108	0.46	0.31	0.673913	0.23	0.741935
	0.97×108	0.42	0.37	0.880952	0.2	0.540541
	0.97×108	0.48	0.33	0.6875	0.22	0.666667
	0.97×107	0.4	0.35	0.875	0.21	0.6
	0.97×107	0.44	0.32	0.727273	0.25	0.78125
	0.97×107	0.49	0.32	0.653061	0.21	0.65625
	0.97×106	0.47	0.36	0.765957	0.26	0.722222
	0.97×106	0.48	0.36	0.75	0.23	0.638889
	0.97×106	0.43	0.35	0.813953	0.19	0.542857
			Table 7 Effect of E. sibiricum on the parasitism of A. gifuensis on M. persicae
			Concentrantion (cuf/ml)	Parasitism rate (%)	Emergence rate (%)	Proportion of females (%)
			Ck	42.67±0.88a	81.33±4.04a	68.67±9.29a
			0.97×1010	42.67±0.88a	83.00±4.58a	65.33±8.32a
			0.97×109	47.00±1.73a	73.33±3.01a	72.33±5.68a
			0.97×108	45.33±1.76a	74.67±1.59a	65.00±10.14a
			0.97×107	44.33±2.60a	75.33±1.67a	68.00±9.16a
			0.97×106	46.00±1.52a	77.67±3.05a	63.33±9.01a
	Bacillus cereus
		Parasitism rate	Number ecolosed	Ecolosion rate	Number of female wasps	Proportion of female wasps
	ck	0.42	0.37	0.880952	0.24	0.648649
	ck	0.45	0.36	0.8	0.22	0.611111
	ck	0.43	0.34	0.790698	0.25	0.735294
	0.97×1010	0.42	0.34	0.809524	0.22	0.647059
	0.97×1010	0.43	0.37	0.860465	0.27	0.72973
	0.97×1010	0.44	0.33	0.75	0.24	0.727273
	0.97×109	0.47	0.35	0.744681	0.22	0.628571
	0.97×109	0.42	0.36	0.857143	0.21	0.583333
	0.97×109	0.46	0.32	0.695652	0.23	0.71875
	0.97×108	0.45	0.32	0.711111	0.25	0.78125
	0.97×108	0.41	0.35	0.853659	0.27	0.771429
	0.97×108	0.46	0.34	0.73913	0.22	0.647059
	0.97×107	0.38	0.31	0.815789	0.21	0.677419
	0.97×107	0.38	0.31	0.815789	0.24	0.774194
	0.97×107	0.41	0.34	0.829268	0.21	0.617647
	0.97×106	0.49	0.35	0.714286	0.24	0.685714
	0.97×106	0.47	0.34	0.723404	0.2	0.588235
	0.97×106	0.49	0.31	0.632653	0.21	0.677419
			Table 8 Effect of B. cereus on the parasitism of A. gifuensis on M. persicae
			Concentrantion (cuf/ml)	Parasitism rate (%)	Emergence rate (%)	Proportion of females (%)
			Ck	43.33±0.88b	82.33±2.84b	66.67±3.84a
			0.97×1010	43.00±0.57b	80.67±3.18b	70.33±2.66a
			0.97×109	45.00±1.52bc	76.67±4.80ab	64.33±4.09a
			0.97×108	44.00±1.52b	76.67±4.25ab	73.33±4.17a
			0.97×107	39.00±1.00a	82.33±0.33b	69.00±4.35a
			0.97×106	48.33±0.66c	68.67±2.84a	65.33±3.18a
	Stenotrophomonas maltophilia
		Parasitism rate	Number ecolosed	Ecolosion rate	Number of female wasps	Proportion of female wasps
	ck	0.43	0.38	0.883721	0.25	0.657895
	ck	0.44	0.36	0.818182	0.23	0.638889
	ck	0.42	0.35	0.833333	0.25	0.714286
	0.97×1010	0.48	0.36	0.75	0.27	0.75
	0.97×1010	0.41	0.31	0.756098	0.19	0.612903
	0.97×1010	0.43	0.37	0.860465	0.22	0.594595
	0.97×109	0.4	0.33	0.825	0.2	0.606061
	0.97×109	0.46	0.36	0.782609	0.21	0.583333
	0.97×109	0.48	0.34	0.708333	0.27	0.794118
	0.97×108	0.43	0.34	0.790698	0.25	0.735294
	0.97×108	0.4	0.32	0.8	0.22	0.6875
	0.97×108	0.5	0.29	0.58	0.24	0.827586
	0.97×107	0.41	0.35	0.853659	0.25	0.714286
	0.97×107	0.47	0.34	0.723404	0.24	0.705882
	0.97×107	0.43	0.36	0.837209	0.25	0.694444
	0.97×106	0.44	0.34	0.772727	0.23	0.676471
	0.97×106	0.41	0.35	0.853659	0.23	0.657143
	0.97×106	0.42	0.36	0.857143	0.21	0.583333
			Table 9 Effect of S. maltophilia on the parasitism of A. gifuensis on M. persicae
			Concentrantion (cuf/ml)	Parasitism rate (%)	Emergence rate (%)	Proportion of females (%)
			Ck	43.00±0.57a	84.33±1.85a	67.00±2.08a
			0.97×1010	44.00±2.08a	79.00±3.51a	65.00±.5.03a
			0.97×109	44.67±2.40a	77.33±3.48a	66.00±6.55a
			0.97×108	44.33±2.96a	72.33±7.17a	75.33±4.09a
			0.97×107	43.67±1.76a	80.33±4.17a	70.33±0.66a
			0.97×106	42.33±0.88a	82.67±2.84a	64.00±3.05a
